# Supplementary material for: Polymerization-induced self-assembly of (2-(4-vinylbenzyl)iso-indoline-1,3-dione) for the synthesis of hydrazine responsive block copolymer nanoparticles
Source: Royal Society of Chemistry journal article supplement (doi:10.1039/d4py00073k), 2024-01-01
Supplement: d4py00073k1.pdf [file d4py00073k1.pdf]

## Supporting Information

### **Polymerization-Induced Self-Assembly of (2-(4-vinylbenzyl) iso-indoline-1,3-dione) for the Synthesis of Hydrazine Responsive Block copolymer Nanoparticles**

Shivshankar R. Mane<sup>\*a,b</sup> and Andrea S. Carlini<sup>\*a,b,c</sup>

<sup>a</sup>Department of Chemistry and Biochemistry, University of California at Santa Barbara, Santa Barbara, CA, 93106, United States.

<sup>b</sup>Center for Polymers and Organic Solids, University of California at Santa Barbara, Santa Barbara, CA 93106, United States.

<sup>c</sup>Department of Biomolecular Science and Engineering, University of California at Santa Barbara, Santa Barbara, CA, 93106, United States.

Corresponding Author: [srmane@ucsb.edu](mailto:srmane@ucsb.edu); [acarlini@ucsb.edu](mailto:acarlini@ucsb.edu)

### Monomer Synthesis Scheme:

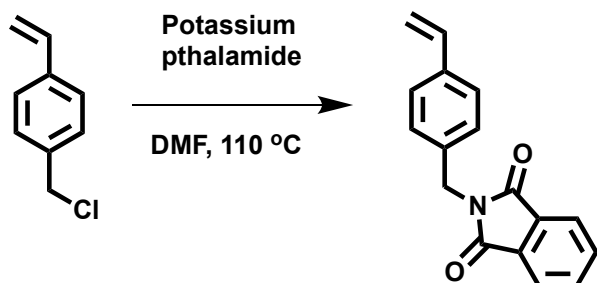

**Scheme S1:** Synthesis of **VBzPHT** monomer.

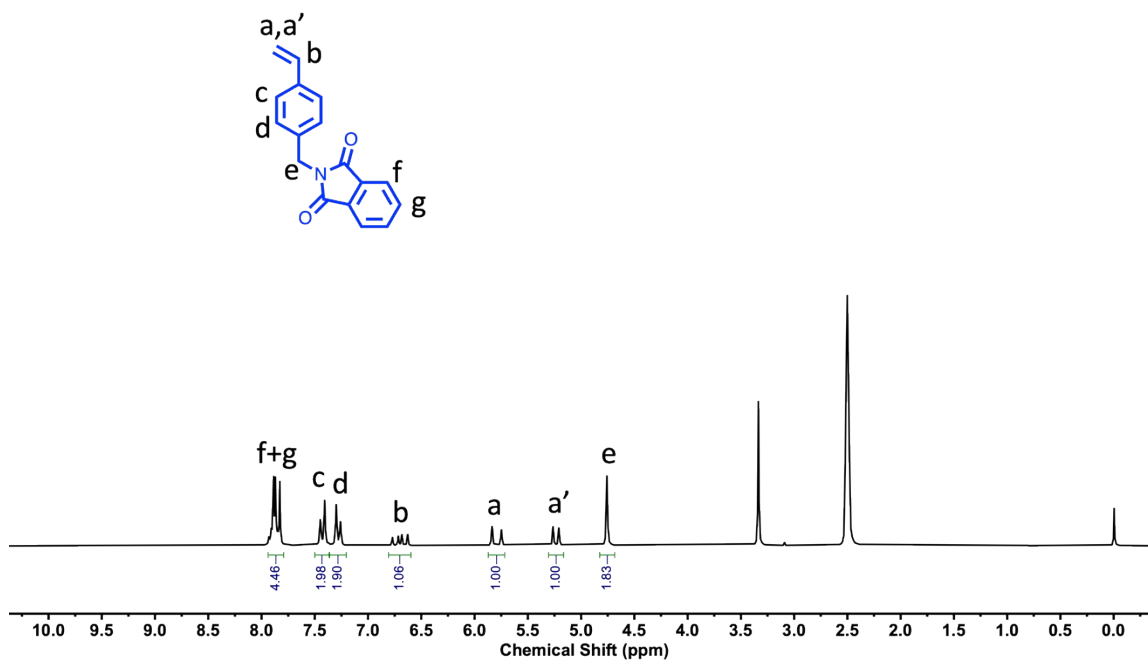

**Figure S1:** <sup>1</sup>H NMR spectra for **VBzPHT** monomer in DMSO-d<sub>6</sub>.

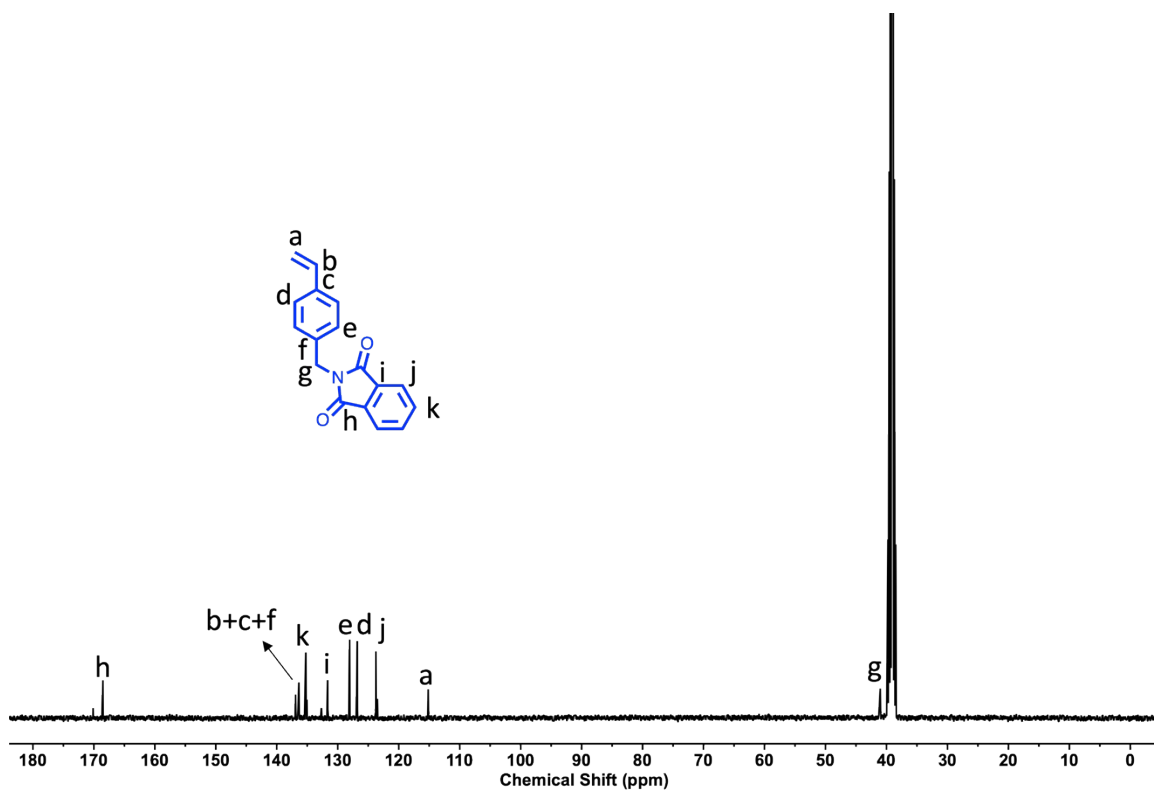

**Figure S2:**  $^{13}\text{C}$  NMR spectra for **VBzPHT** monomer in DMSO- $d_6$ .

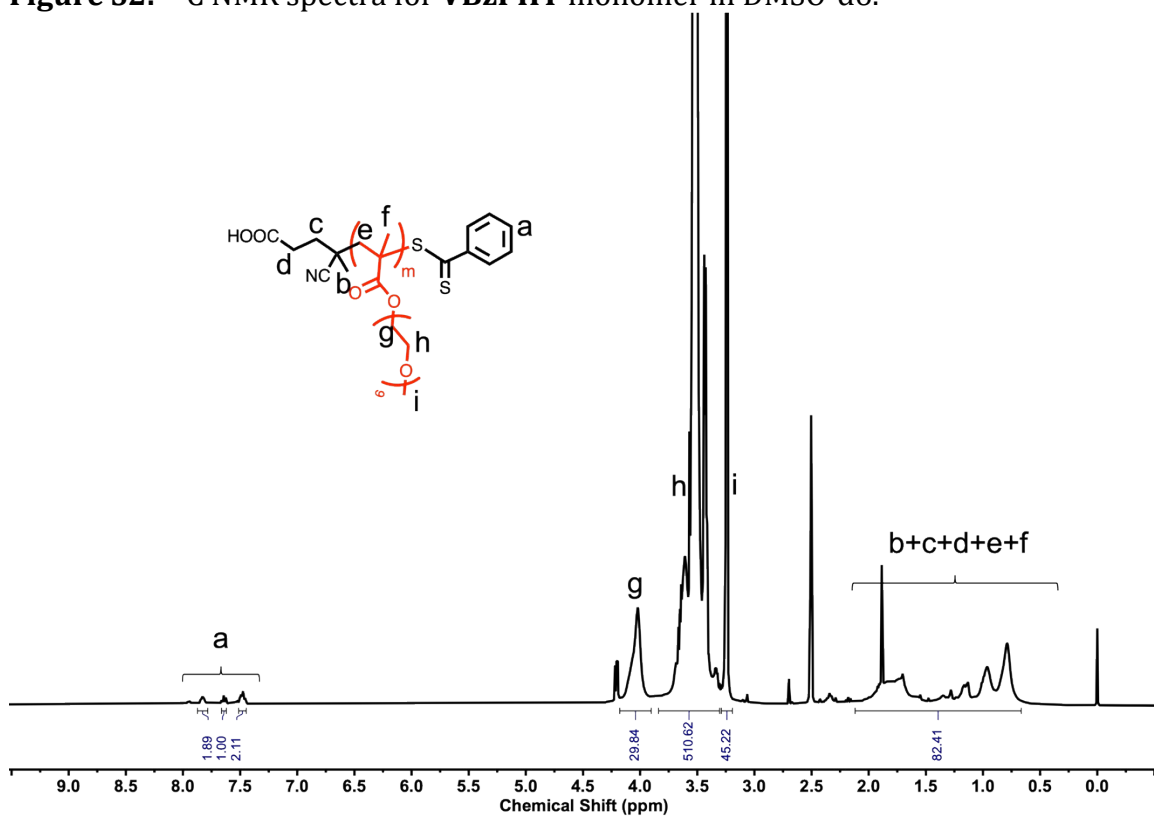

**Figure S3:**  $^1\text{H}$  NMR spectra for **macro-CTA** in DMSO- $d_6$ .

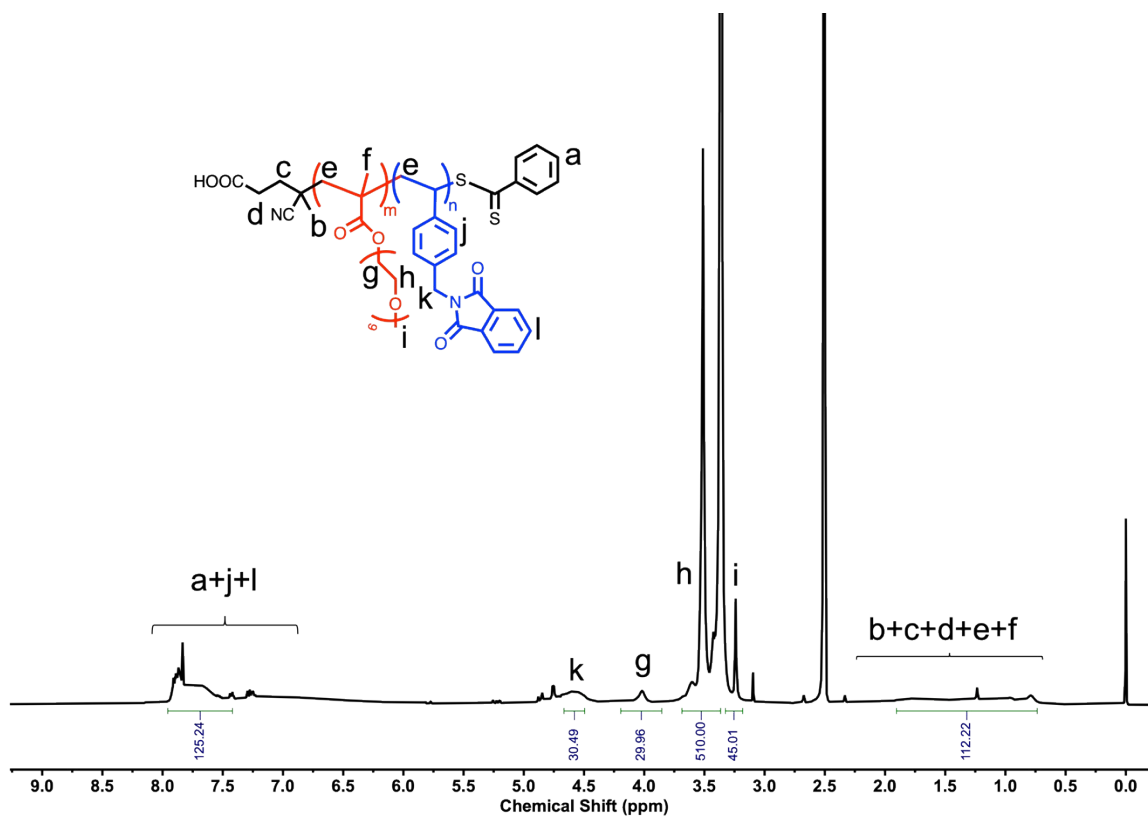

**Figure S4:**  $^1\text{H}$  NMR spectra for P1 in DMSO- $d_6$ .

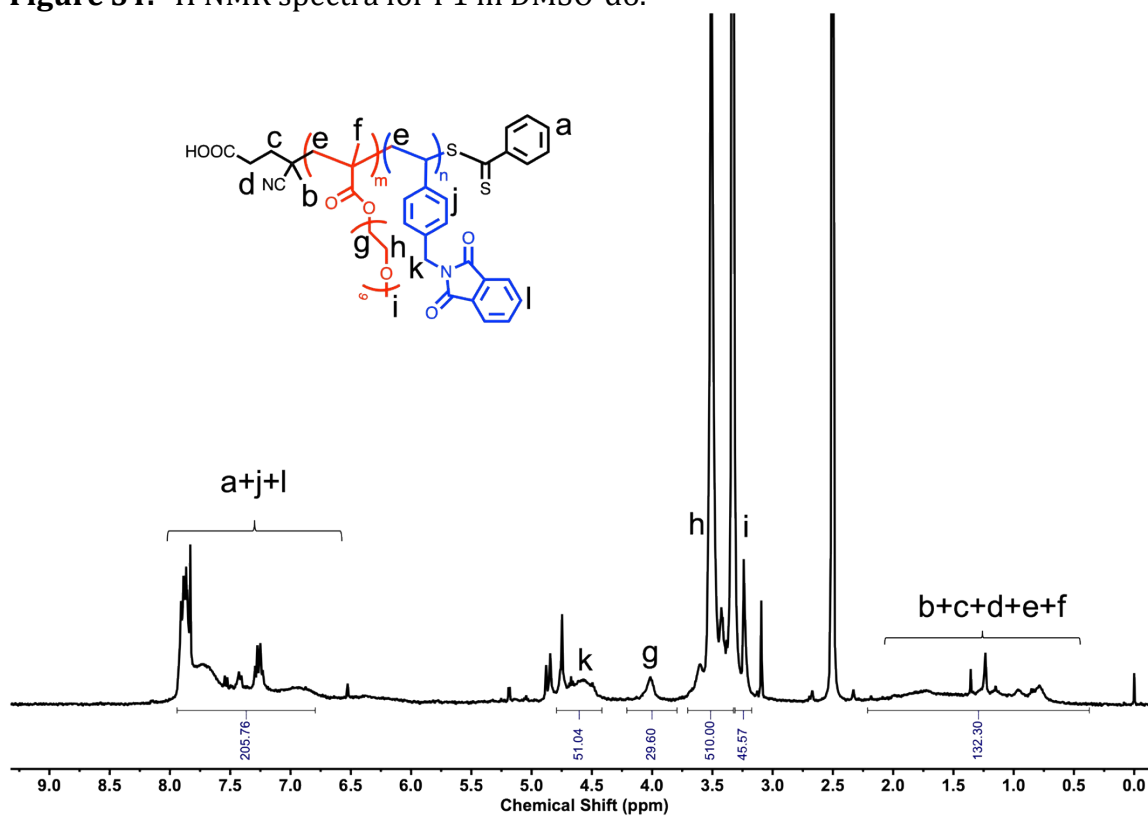

**Figure S5:**  $^1\text{H}$  NMR spectra for P2 in DMSO- $d_6$ .

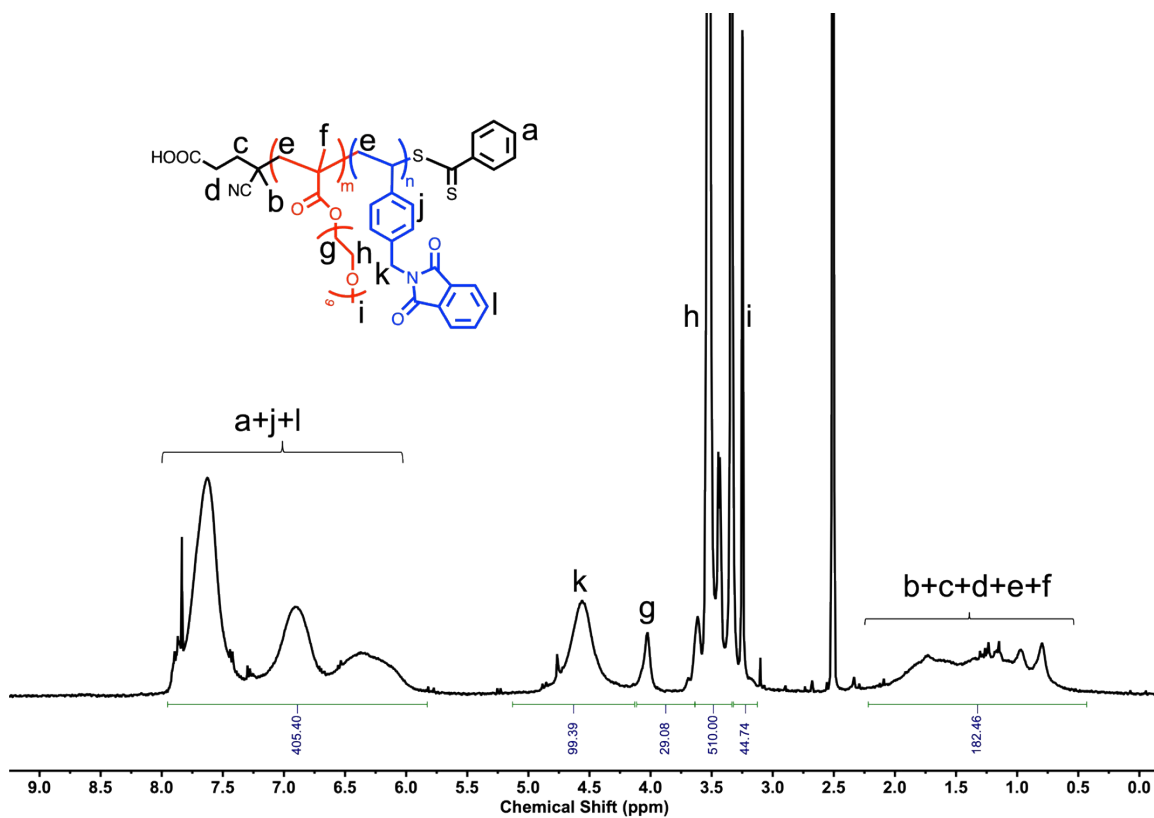

**Figure S6:**  $^1\text{H}$  NMR spectra for P3 in DMSO- $d_6$ .

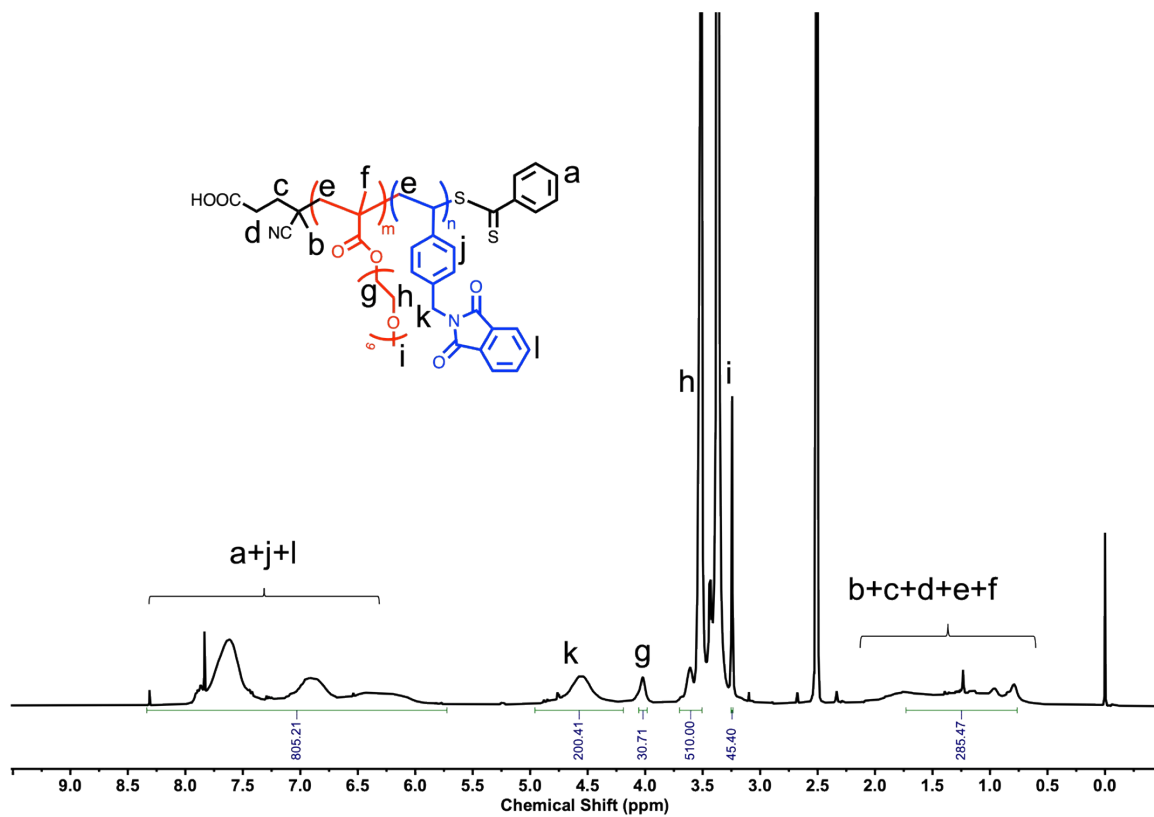

**Figure S7:**  $^1\text{H}$  NMR spectra for P4 in DMSO- $d_6$ .

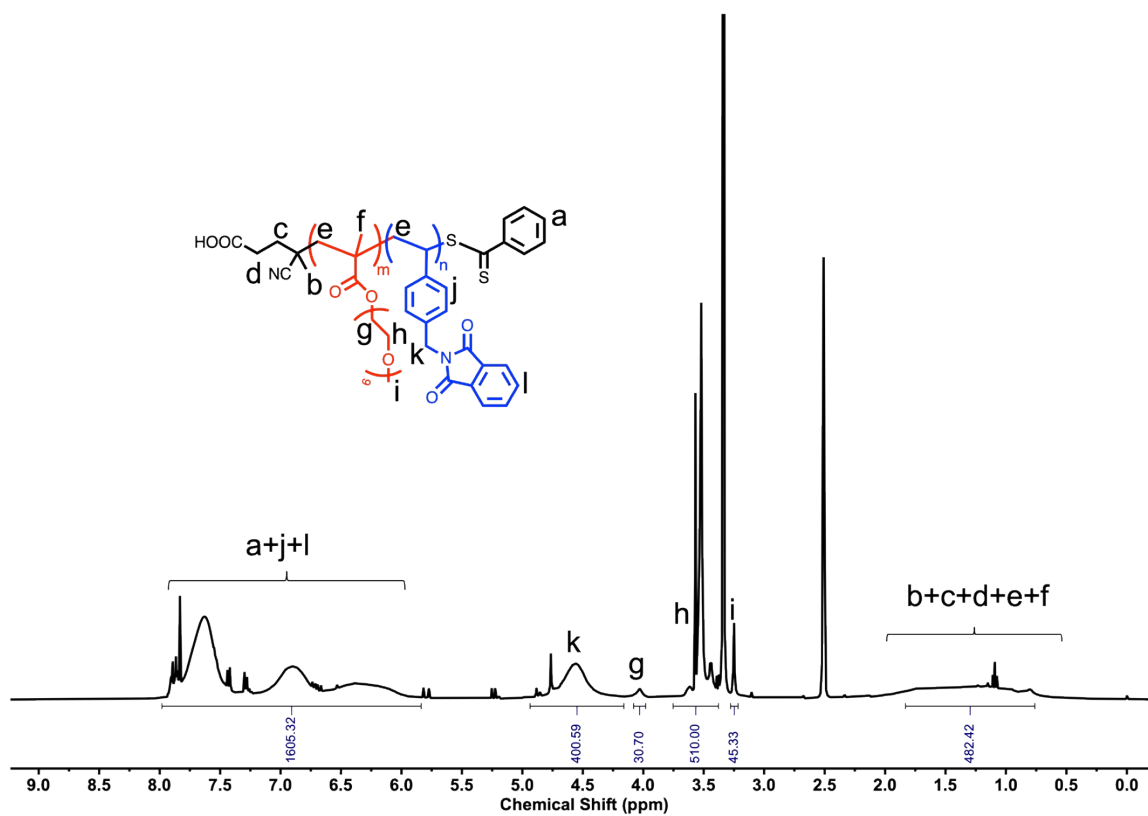

**Figure S8:**  $^1\text{H}$  NMR spectra for P5 in  $\text{DMSO-d}_6$ .

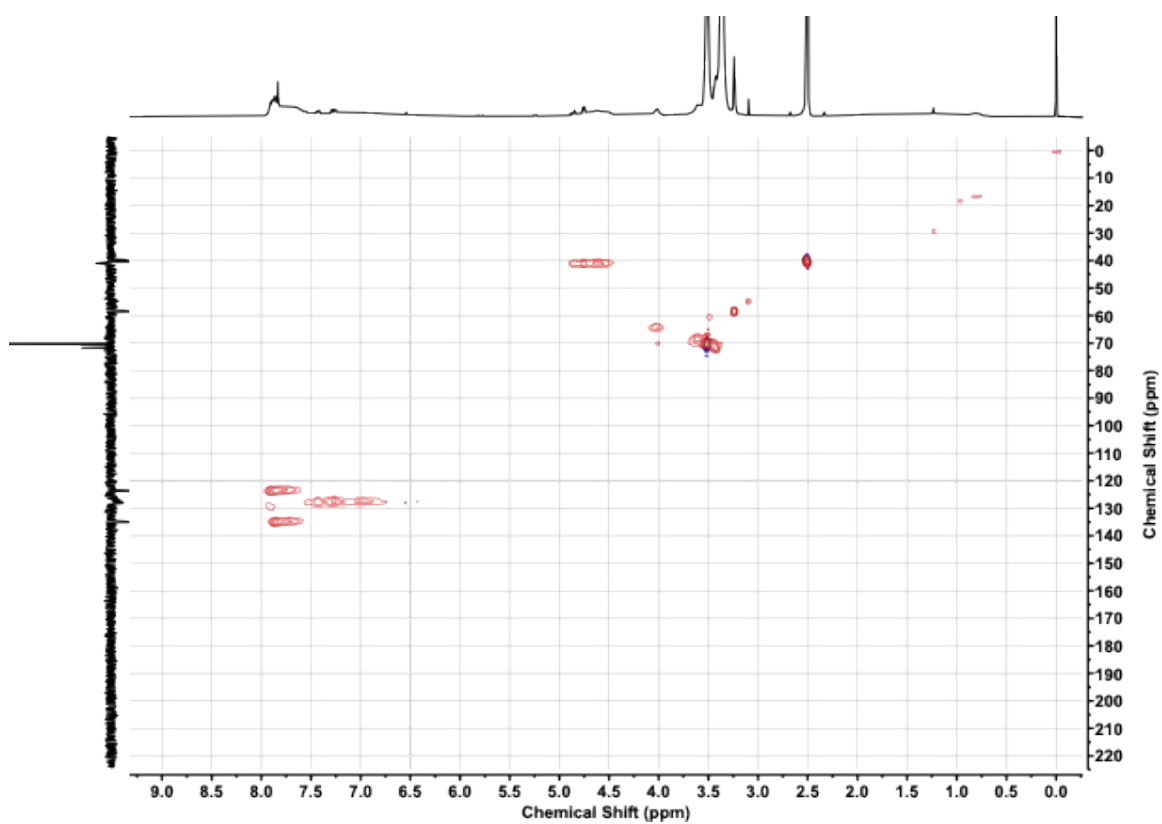

**Figure S9:** HSQC NMR spectra for P1 in DMSO-d<sub>6</sub>.

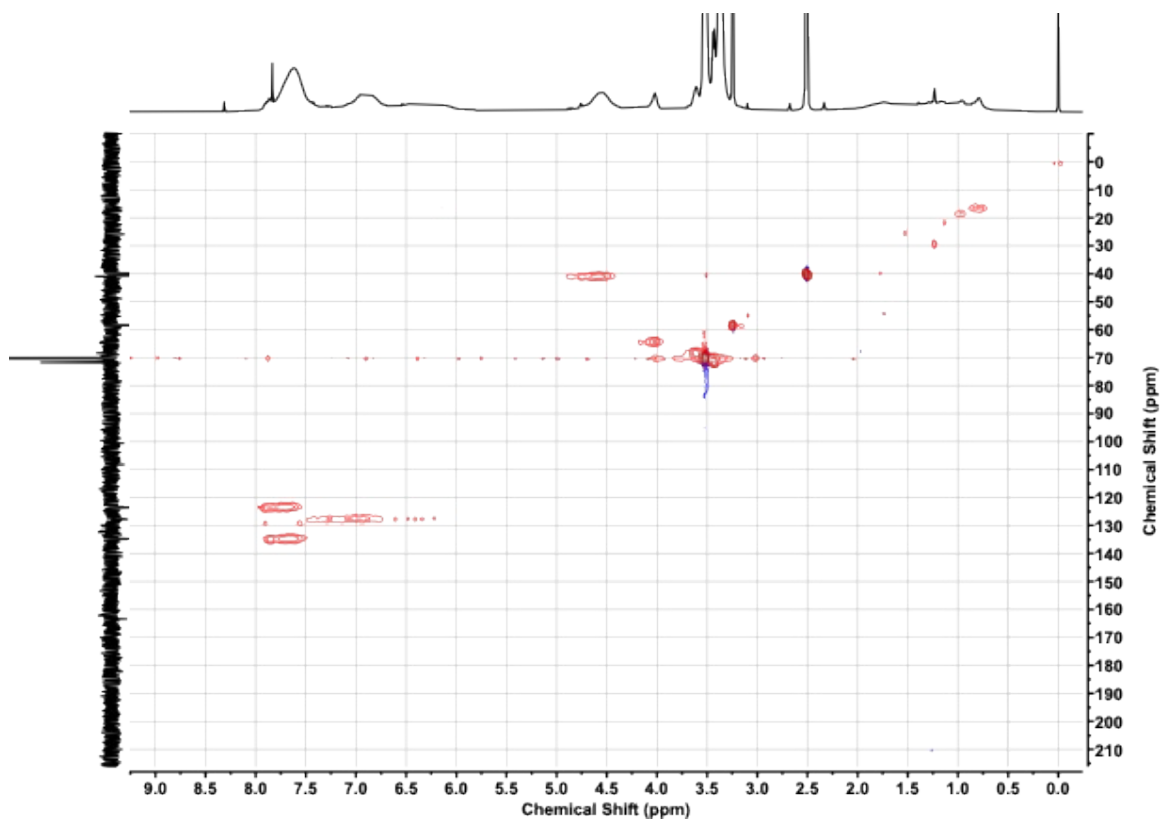

**Figure S10:** HSQC NMR spectra for P4 in DMSO-d<sub>6</sub>.



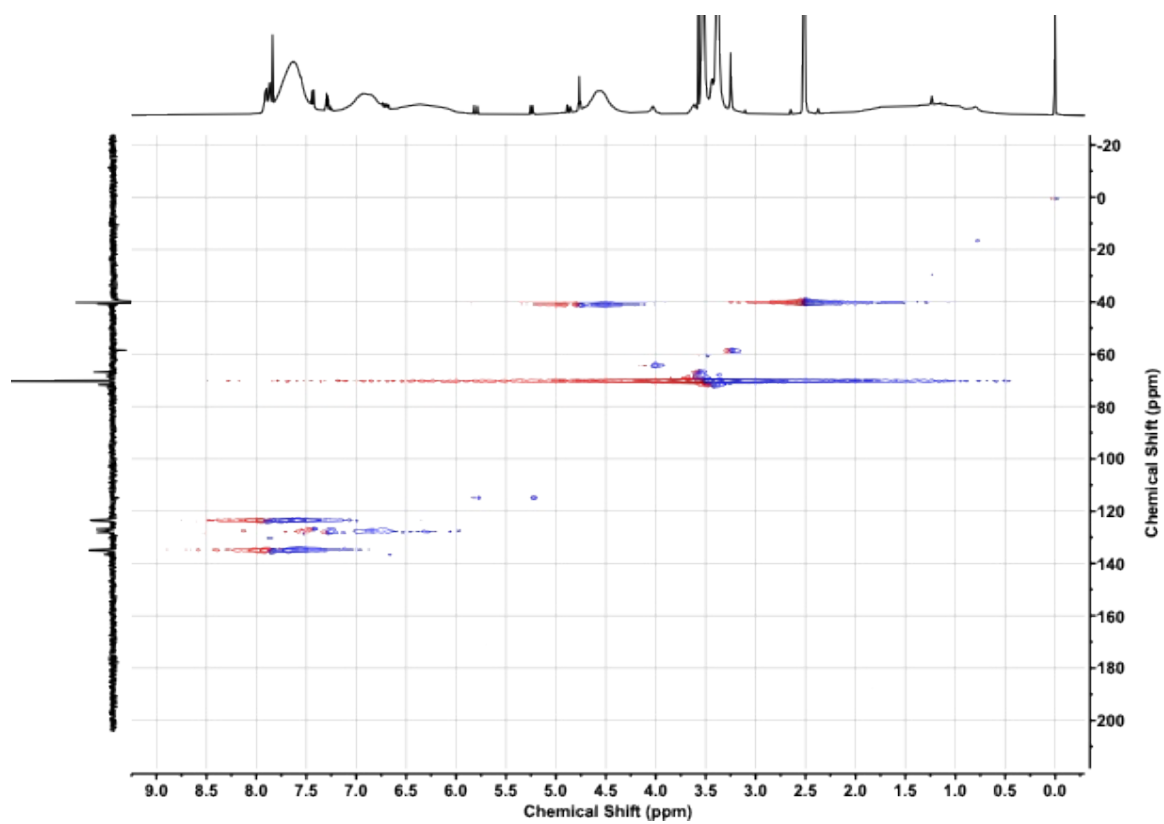

**Figure S11:** HSQC NMR spectra for P5 in DMSO-d<sub>6</sub>.

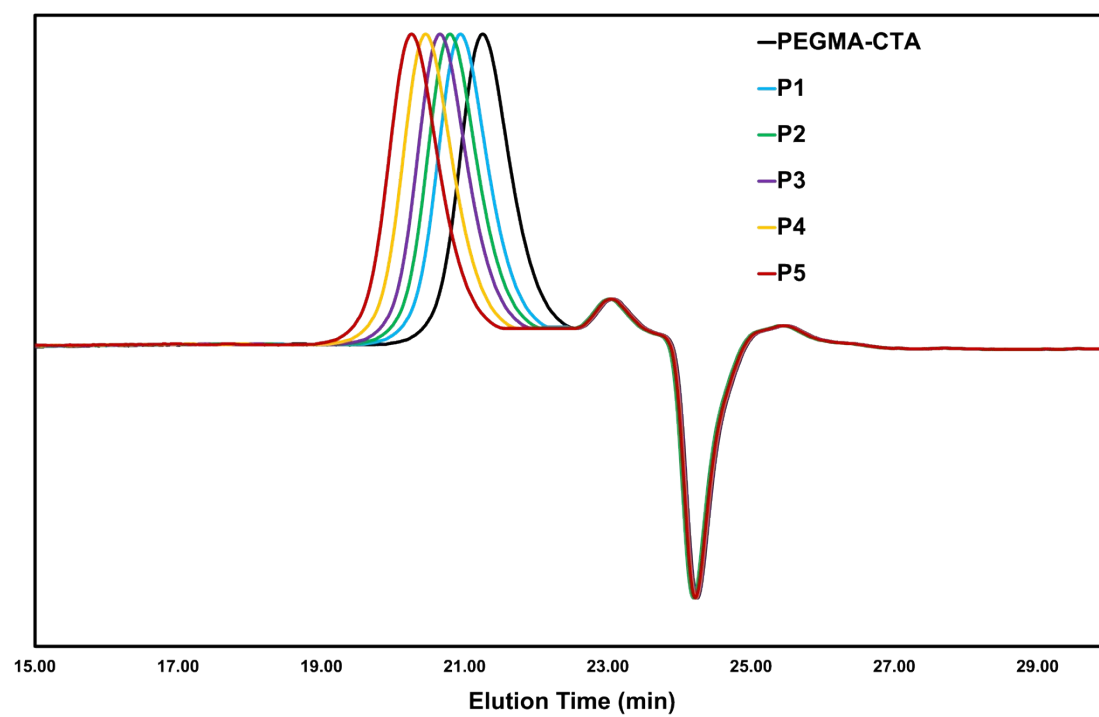

**Figure S12:** SEC analysis for **PEGMA<sub>m</sub>-*b*-PVBzPHT<sub>n</sub>** block copolymer (P1-P5).

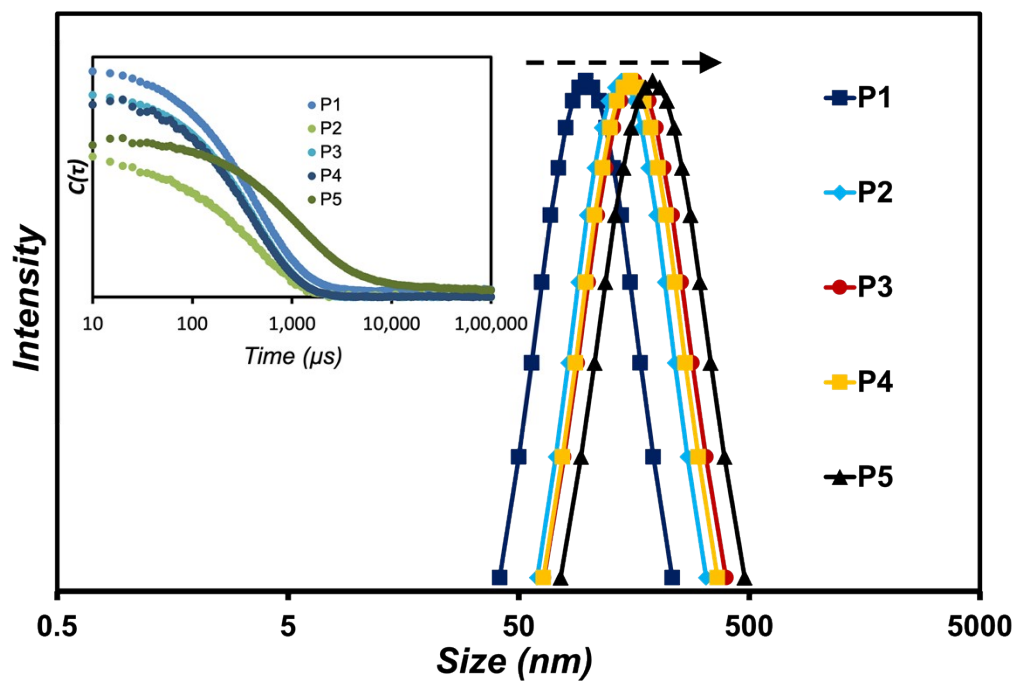

**Figure S13:** DLS data for  $\text{PEGMA}_m\text{-}b\text{-PVBzPHT}_n$  block copolymer in water (P1=98 nm (PDI 0.31); P2=139 nm (PDI 0.3); P3= 159 nm (PDI 0.35); P4= 152 nm (PDI 0.32); P5=190 nm (PDI 0.36)); inset shows relative autocorrelation function for P1-P5 in water.

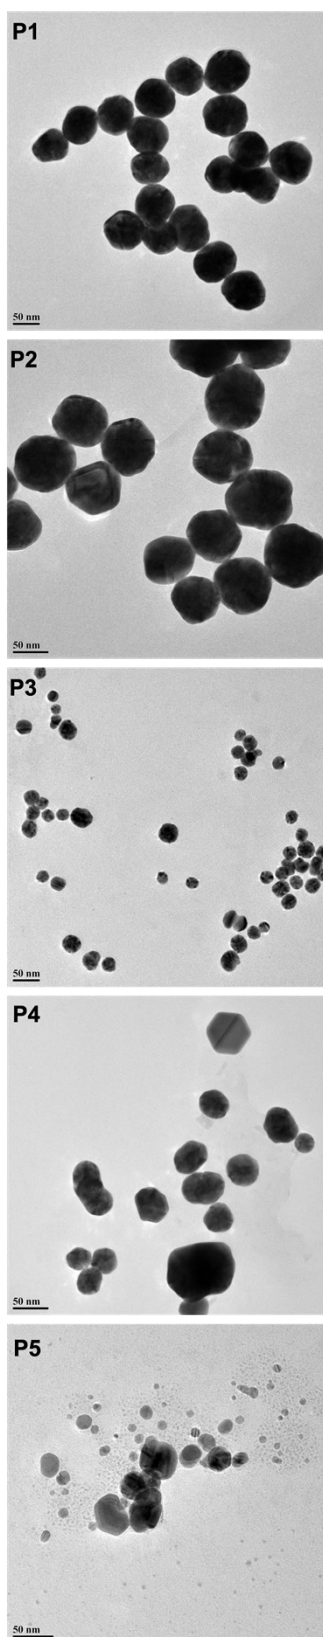

**Figure S14:** Unstained dry state TEM images for P1-P5 in MeOH.

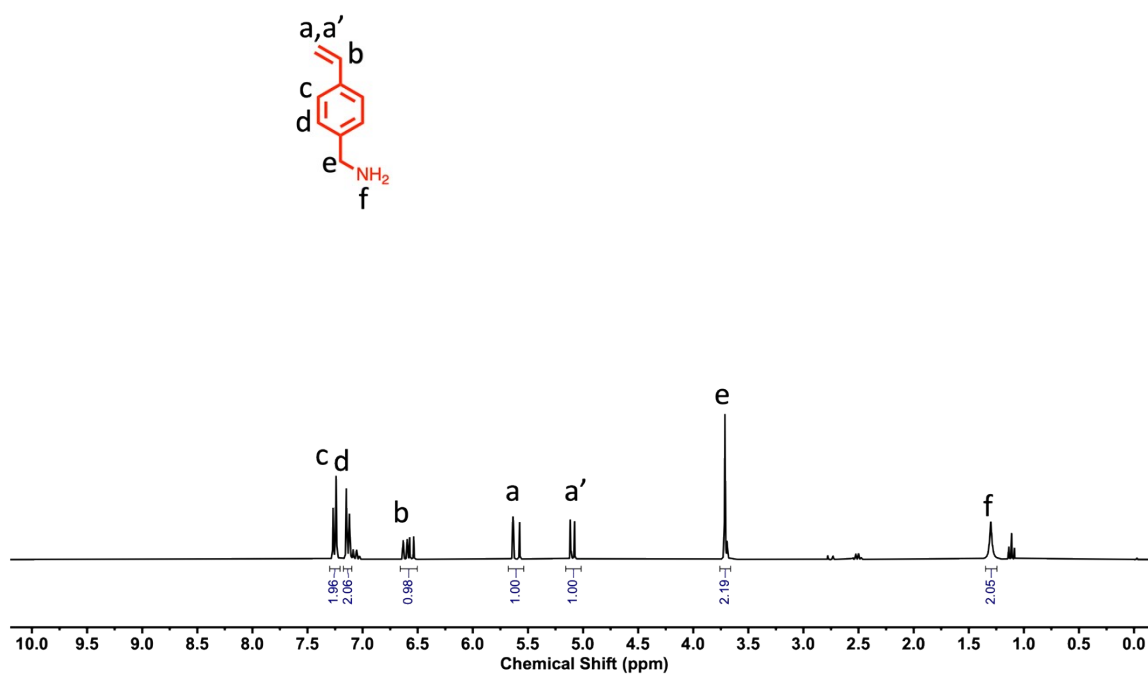

**Figure S15:**  $^1\text{H}$  NMR spectra for  $\text{VBzNH}_2$  after deprotection in  $\text{DMSO-d}_6$ .

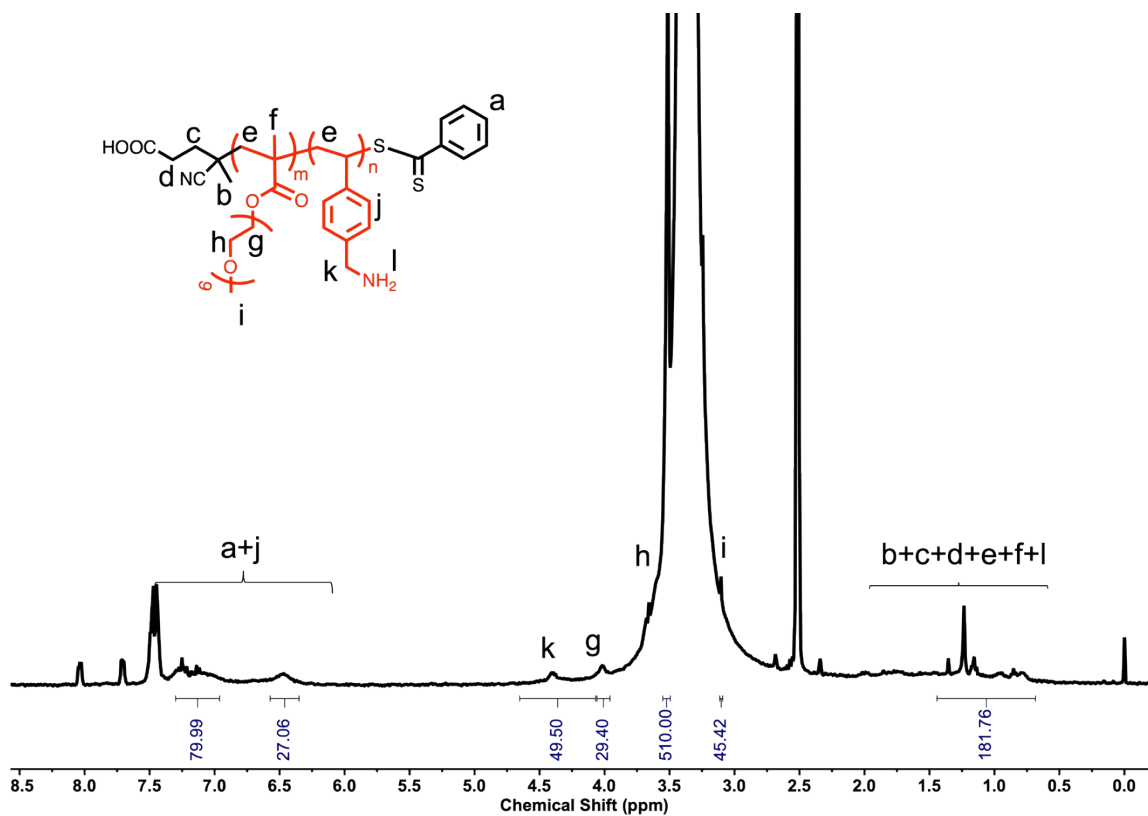

**Figure S16:**  $^1\text{H}$  NMR spectra for P2 (after 20 hr deprotection-hydrazine treatment) in  $\text{DMSO-d}_6$ .

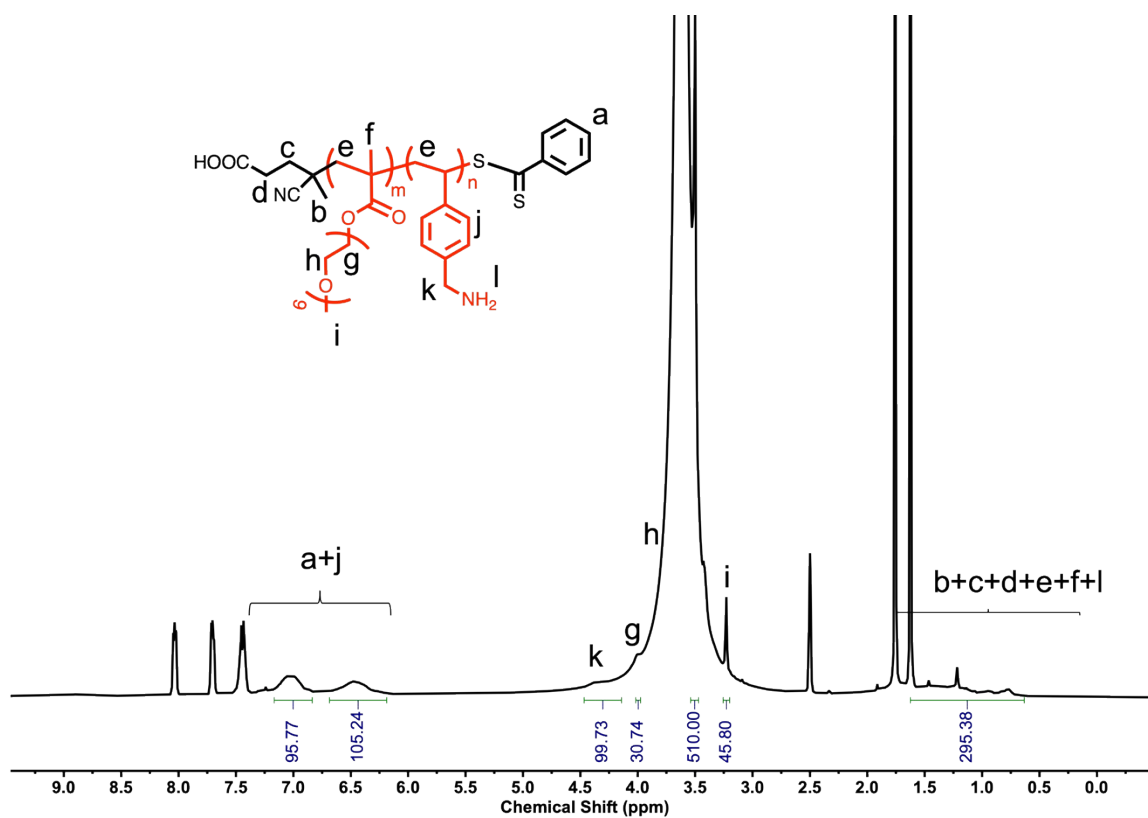

**Figure S17:**  $^1\text{H}$  NMR spectra for P3 (after 20 hr deprotection-hydrazine treatment) in  $\text{DMSO-d}_6$ .

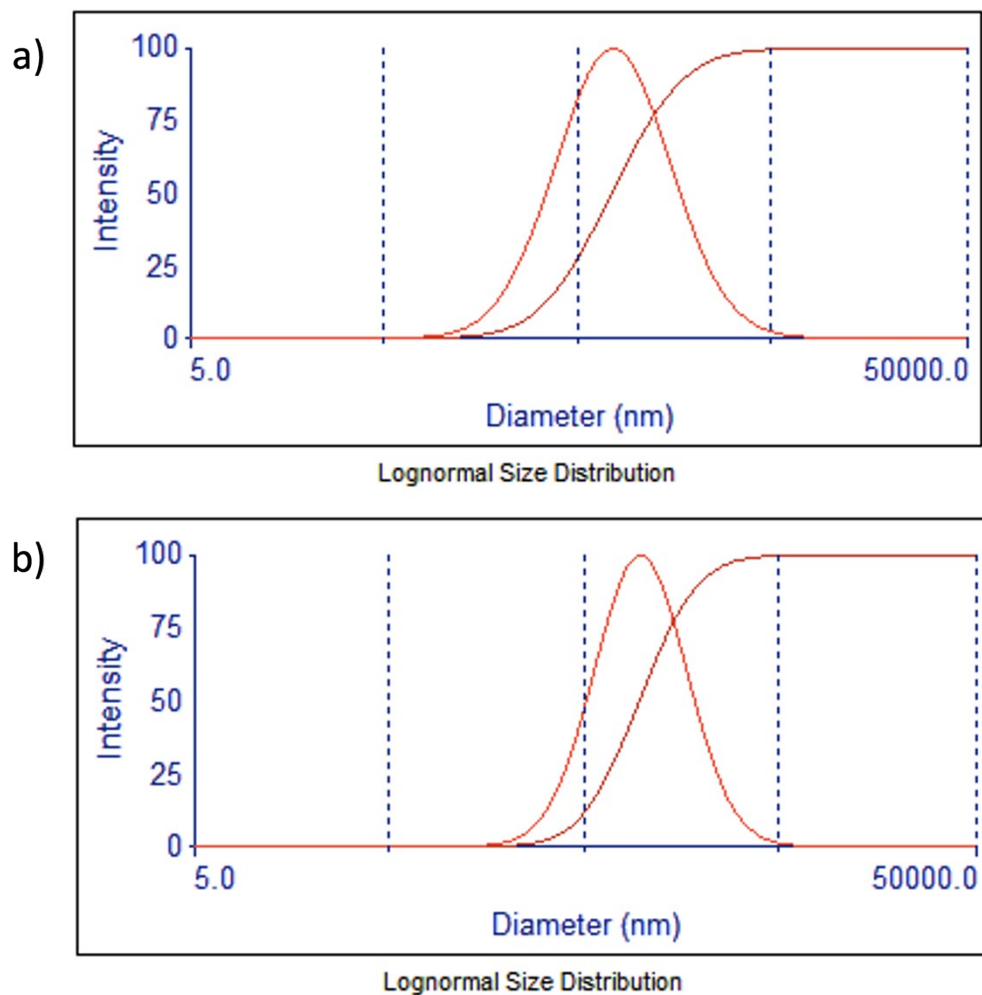

**Figure S18:** Representative DLS data for **PEGMA<sub>m</sub>-*b*-PVBzPHT<sub>n</sub>** block copolymer after hydrazine treatment followed by hydration: (a) P2 after hydrazine treatment (P2= 757 nm, PDI 0.57); (b) P3 after hydrazine treatment (P3= 967 nm, PDI 0.34).



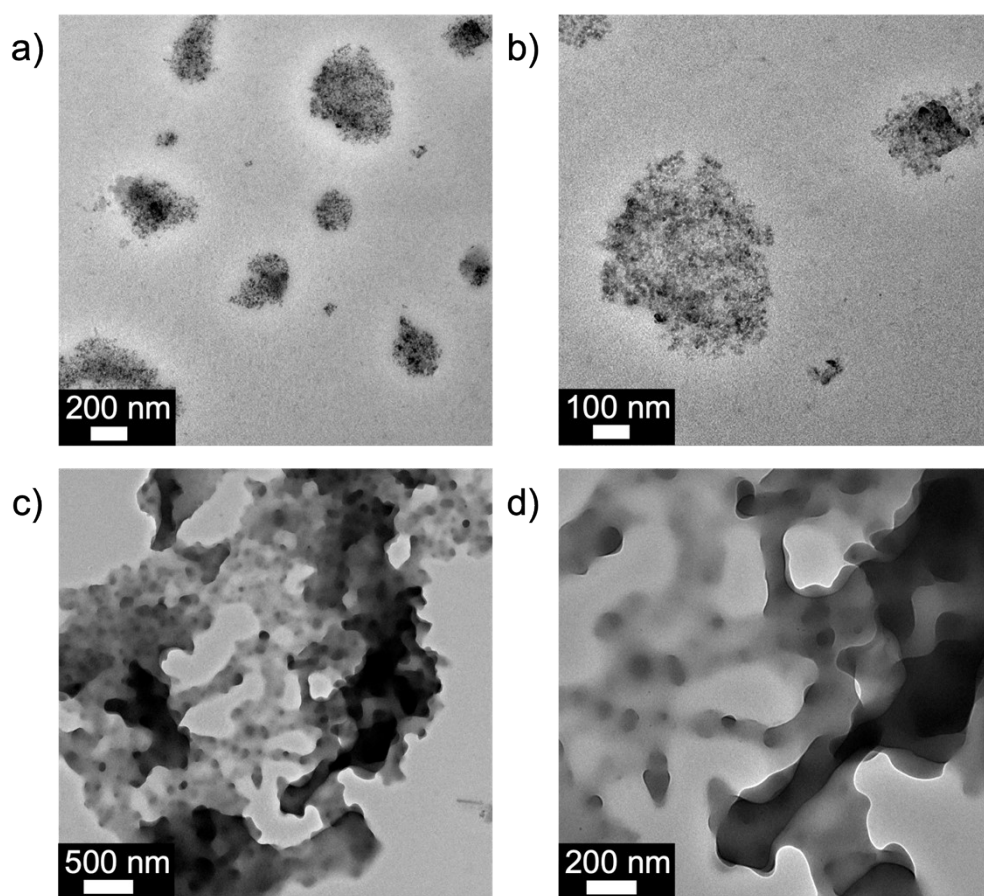

**Figure S19:** TEM image for **PEGMA-*b*-VBzNH<sub>2</sub>** block copolymer (after dis-assembly and reassembly): for P2 (a & b); P3 (c & d).
